# Supplementary material
Source: PubMed Central journal article supplement (PMC2700889)
Supplement: 0900604106_0900604106SI.pdf [file 0900604106_0900604106SI.pdf]

# Supporting Information

Kosugi et al. 10.1073/pnas.0900604106

## SI Text

**Plasmid Constructions.** To create the NLS profiles, double-stranded oligonucleotides encoding an NLS were inserted into the XbaI and BamHI sites of pTUE-GFP, a universal GFP reporter plasmid (1). For the localization analysis of yeast proteins fused to GFP, PCR-amplified yeast ORFs were inserted into the XbaI and BamHI sites or BamHI site of pGAD-GFP, a yeast-specific GFP expression plasmid that was generated by the replacement of the HindIII fragment of pGAD424 (Clontech) with the fragment containing the GFP-MCS region from pCMV-GFP2 (2). To alleviate the toxicity caused by the overexpression of several proteins, the ORFs were cloned into the low-copy plasmid pAUA-GFP or the inducible expression plasmid pYES-GFP. The former is derived from pAUR112 (Takara) and contains the GFP-MCS region under the control of the *adh1* promoter, whereas pYES-GFP contains the GFP-MCS fragment cloned downstream of the GAL1 promoter of pYES-Trp-2 (Invitrogen).

## Yeast Manipulation and Measurement of Nuclear Import Activities.

Yeast manipulations, including culture and transformation, were performed as described previously (2), and the strain SFY526

(Clontech) or YNN141 (*MATa his3-532 trp1-289 ura3-1 ura3-2 ade2 leu2::HIS3*), a derivative of YNN140 (National Institute of Technology and Evaluation, Biological Resources Center), was used in most experiments. The *cdc28-as1* strain was produced by introducing a point mutation into YNN141 to replace Cdc28 Phe-88 with Gly (3). To produce the *msn5Δ* strain, an *msn5* deletion mutation was created by the transformation of YNN141 with a PCR fragment containing the *ADE2* marker and the 5'- and 3'-terminal sequences of the *MSN5* gene. A strain with a LMB-sensitive allele of Crm1 (T539C) was produced as described previously (4). Yeast was transformed with a GFP reporter plasmid or cotransformed with the pTUE-GFP3 and pGBK-tTA plasmids, and cultured at 30 °C with synthetic defined (SD) medium lacking the appropriate amino acids. GUS-GFP-NLS or GFP fusion proteins expressed in the transformed cells were observed with an epifluorescence microscope, model BX51 (Olympus), with an excitation filter specific for 460–490 nm. To determine the activity levels of various NLSs, the relative levels of the nuclear import activities were ranked as 1 of the 10 levels based on the localization phenotype of the GFP reporter, as described (2).

1. Kosugi S, et al. (2009) Six classes of nuclear localization signals specific to different binding grooves of importin  $\alpha$ . *J Biol Chem* 284:478–485.
2. Kosugi S, et al. (2008) Design of peptide inhibitors for the importin  $\alpha/\beta$  nuclear import pathway by activity-based profiling. *Chem Biol* 15:940–949.
3. Bishop AC, et al. (2000) A chemical switch for inhibitor-sensitive alleles of any protein kinase. *Nature* 407:395–401.
4. Kosugi S, Hasebe M, Tomita M, Yanagawa H (2008) Nuclear export signal consensus sequences defined using a localization-based yeast selection system. *Traffic* 9:2053–2062.
5. Ubersax JA, et al. (2003) Targets of the cyclin-dependent kinase Cdk1. *Nature* 425:859–864.
6. Archambault V, et al. (2004) Targeted proteomic study of the cyclin-Cdk module. *Mol Cell* 14:699–711.

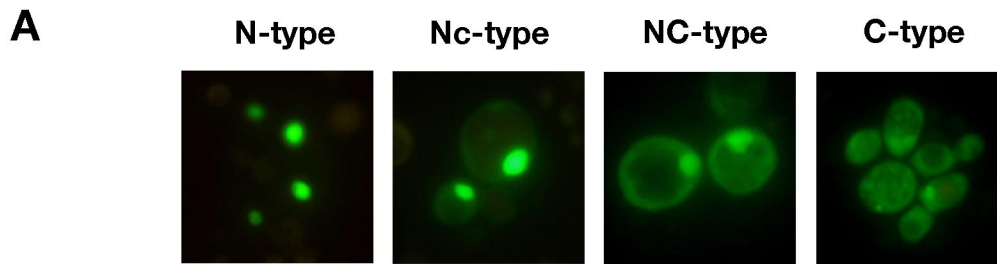

**B**

| Scores                   | 10 | 9     | 8    | 7  | 6     | 5     | 4  | 3    | 2    | 1 |
|--------------------------|----|-------|------|----|-------|-------|----|------|------|---|
| Ratio of four cell types | N  | N>>Nc | N>Nc | Nc | Nc>NC | Nc<NC | NC | NC>C | NC<C | C |

**Fig. S1.** Score representation of relative levels of NLS Activity. (A) Four different phenotypes for GFP localization. The extents of nuclear localization of the GUS-GFP reporter fusion protein in budding yeast were categorized into 4 types: (i) N, exclusively nuclear; (ii) Nc, partially nuclear; (iii) NC, localized into both the nucleus and the cytoplasm in a similar extent; and (iv) C, cytoplasmic. (B) Scores for relative NLS activity. Even a single species of NLS often conferred different GFP localization phenotypes in transformed cells. Thus, NLS activity was ranked in 1 of the 10 levels based on both the GFP localization phenotypes indicated in A and the proportion of cells with the specific GFP phenotypes among whole GFP-positive cells. The scoring was standardized as follows: score 10 (>99% of cells with phenotype N), 9 (99–90% of N), 8 (89–70% of N), 7 (69–40% of N, other Nc), 6 (Nc > N > NC), 5 (N < Nc < NC), 4 (>70% of NC, Nc > C), 3 (NC > C), 2 (NC < C), and 1 (>95% of C). In some cases, a relative difference in the intensity of GFP fluorescence between the nucleus and the cytoplasm was used to determine the final score. Several scores <1 and >10 were estimated based on the activities determined by using a different template with a contrasting level of basal activity. This figure is from ref. 2.







| Class 2    |       | Class 2      |       | Class 2    |       |
|------------|-------|--------------|-------|------------|-------|
|            | Score |              | Score |            | Score |
| AAPKRARIDA | 6     | RRHVAAKRLRIT | 5     | PVGKRCRGN  | 3     |
| *****VC*   | 4     | VPAP*****    | 6     | *RSKRIRAI  | 5     |
| *****TP*   | 1     | TPGP*****    | 9     | *KRKRLRNS  | 10    |
| *****YG*   | 5     | RSSA*****    | 3     | *KTKKSRIV  | 8     |
| *****TF*   | 3     | RLSP*****    | 7     | *NAKRSRYN  | 7     |
| *****AN*   | 1     | PDHS*****    | 4     | *RRKKERRA  | 4     |
| *****LL*   | 3     | AYSF*****    | 5     | *PPKRTKTA  | 9     |
| *****AC*   | 2     | GRFD*****    | 2     | *GPKRIRVA  | 5     |
| *****RV*   | 3     | DEGR*****    | 9     | *VTKRSRVF  | 5     |
| *****LC*   | 6     | DPVP*****    | 8     | *LSKRRKIP  | 10    |
| *****DP*   | 1     | SPAA*****    | 2     | *YYKRPKTQ  | 7     |
| *****HA*   | 3     | VPRA*****    | 5     | *SNKPRPWF  | 5     |
| *****GP*   | 1     | VAGS*****    | 5     | *PQKKRRLLE | 10    |
| *****WV*   | 2     | WPPR*****    | 8     | *AWKRNKRV  | 4     |
| *****VI*   | 2     | EGGK*****    | 6     | *GRKKAATR  | 6     |
| *****CR*   | 2     | TLGG*****    | 5     | *PCKKPKIE  | 10    |
| *****TL*   | 4     | QEGE*****    | 2     | *PGKKIKWG  | 6     |
| *****MK*   | 1     | WPHD*****    | 2     | *ERKKTIVG  | 7     |
| *****LP*   | 2     | RGQM*****    | 5     | *NNKRRKDV  | 4     |
| *****YV*   | 2     | AQIT*****    | 2     | *PTKRPKAR  | 7     |
| *****NP*   | 1     | RGHD*****    | 2     | *KRKRFFKY  | 9     |
| *****FV*   | 3     | SPPP*****    | 7     | *TAKRRRRR  | 9     |
| *****VD*   | 6     | PHTG*****    | 4     | *DNKRRRGR  | 4     |
| *****KG*   | 2     | KGST*****    | 4     | *QPKRSRGP  | 5     |
| *****SF*   | 1     | SSTR*****    | 8     | *LRKARRP   | 9     |
| *****LG*   | 4     | GVRS*****    | 6     | *TDKARMC   | 2     |
| *****HQ*   | 2     | ASLV*****    | 4     | *SCKRGKDF  | 1     |
| *****VA*   | 3     | GKAA*****    | 3     | *GAKKVKGG  | 1     |
| *****DV*   | 1     | ALIT*****    | 2     | *VQKRGKIQ  | 3     |
| *****MG*   | 2     | HAHH*****    | 8     | *LAKRSKEN  | 2     |
| *****AW*   | 1     | SHEA*****    | 2     | *DPKQKQNS  | 5     |
| *****LY*   | 4     | LASH*****    | 7     | *DDKRTKRY  | 1     |
| *****FE*   | 4     | AHRC*****    | 5     | *VPKWKWGT  | 6     |
| *****VY*   | 3     | PIED*****    | 2     | *RAKRCRQE  | 7     |
| *****FN*   | 5     | ATLS*****    | 4     | *ALKKDKRR  | 1     |
| *****YS*   | 4     | SARW*****    | 5     | *QCKRLRTY  | 7     |
| *****VL*   | 2     | GPSP*****    | 7     | *PIKRSKSG  | 6     |
|            |       | PVEG*****    | 4     | *RVKRVRAA  | 4     |
| HPRKRARLS  | 10    | RCYA*****    | 5     | *DCKRMKSR  | 4     |
| PNM*****   | 8     | CSHG*****    | 5     | *SVKRLRVA  | 8     |
| TAV*****   | 7     | RQIN*****    | 5     | *PPKRIKTR  | 9     |
| TVW*****   | 5     | GSPL*****    | 3     | *AYKRRKMT  | 10    |
| PMI*****   | 9     | PNQP*****    | 7     | *IAKKCKDW  | 2     |
| VMQ*****   | 3     | PPhi*****    | 3     | *YRKRRRQP  | 8     |
| LDQ*****   | 2     | RRRR*****    | 8     | *VVKRLRQV  | 5     |
| VNQ*****   | 4     | LQVF*****    | 3     | *DAKRRRHT  | 2     |
| NCE*****   | 2     | QRSV*****    | 3     | *GYKRPPTP  | 5     |
| LAR*****   | 9     | RSIS*****    | 4     | *VVKRAKWY  | 7     |
| APE*****   | 2     | GADL*****    | 2     | *CPKKTIVV  | 7     |
| LTP*****   | 5     | LART*****    | 4     | *LVKKHRQT  | 3     |
| GDT*****   | 6     | EGLV*****    | 4     | *EGKRVREG  | 2     |
| RIS*****   | 8     | SCLP*****    | 9     | *GPKRPKMR  | 4     |
| HSV*****   | 8     | LEPC*****    | 3     | *ARKKNSY   | 7     |
| RTP*****   | 8     | ASGH*****    | 8     | *LEKRSRSW  | 2     |
| VLQ*****   | 2     | RRTP*****    | 7     | *WAKKARVW  | 4     |
| ITP*****   | 5     | GPSQ*****    | 6     | *RKQRQSK   | 8     |
| GTT*****   | 6     | IRTR*****    | 9     | *YRKRGKKQ  | 3     |
| SIN*****   | 5     | LTLR*****    | 8     | *LSKVKVGR  | 3     |
| TSK*****   | 8     | PVQA*****    | 4     | *AAKRRRNL  | 9     |
| VPL*****   | 9     | LQNR*****    | 7     | *KPKKTKMY  | 6     |
| WVA*****   | 6     | QRRD*****    | 4     | *GPKKAKQR  | 2     |
| ILK*****   | 6     | SPCR*****    | 8     | *QVKRARQA  | 7     |
| RYM*****   | 8     | TPPE*****    | 2     | *SGKRGKE   | 1     |
| SSY*****   | 9     | RPPV*****    | 4     | *HPKPPRTL  | 8     |
| QSS*****   | 7     | APHP*****    | 7     | *QPKRARQH  | 5     |
| LNF*****   | 8     | QSLD*****    | 2     | *PGKRRSS   | 8     |
| WTL*****   | 6     | GLGP*****    | 8     | *ARKRLRAK  | 9     |
| WSK*****   | 8     | MQLS*****    | 3     | *PNKVVRTT  | 9     |
| WKT*****   | 7     | CRIA*****    | 3     | *ITKRRKPP  | 4     |
| LKF*****   | 8     |              |       | *HRKRHKVR  | 8     |
| REF*****   | 8     |              |       | *NRKRRKPL  | 9     |
| REP*****   | 7     |              |       | *WGKRVRGQ  | 1     |
| GPT*****   | 7     |              |       | *EKRPKHP   | 6     |
| RYD*****   | 2     |              |       | *TLKRAKRS  | 9     |
|            |       |              |       | *LWKTRSL   | 2     |
|            |       |              |       | *CTKRLRSC  | 7     |

Fig. S5. Class 2 NLSs simultaneously mutated at multiple sites. The analysis was conducted as in Fig. S2. Asterisks represent unchanged residues.

**Class 3**

|            | Score |
|------------|-------|
| AAKRSWSMAF | 10    |
| ****KRM*** | 7     |
| ****RRC*** | 9     |
| ****WVG*** | 4     |
| ****RWQ*** | 9     |
| ****RRS*** | 10    |
| ****DRW*** | 6     |
| ****FRF*** | 3     |
| ****VRS*** | 6     |
| ****WRW*** | 1     |
| ****LWI*** | 6     |
| ****SWP*** | 9     |
| ****RWQ*** | 9     |
| ****PWP*** | 9     |
| ****CRL*** | 8     |
| ****VRY*** | 8     |
| ****RRR*** | 9     |
| AAKRPYQMAF | 9     |
| ****LYQ*** | 6     |
| ****QYL*** | 7     |
| ****LFQ*** | 4     |
| ****QFL*** | 5     |
| ****LYL*** | 5     |
| ****QYQ*** | 7     |
| ****LFL*** | 3     |
| AAKRSWAQAF | 10    |
| ****R*AY** | 9     |
| ****G*LI** | 9     |
| ****T*GD** | 10    |
| ****H*TC** | 8     |
| ****W*GK** | 3     |
| ****L*TF** | 7     |
| ****P*TR** | 9     |
| ****S*GR** | 9     |
| ****T*YT** | 10    |
| ****L*GP** | 1     |
| ****P*DG** | 7     |
| ****Q*GN** | 7     |
| ****V*GV** | 9     |
| ****S*SL** | 10    |

**Class 3**

|            | Score |
|------------|-------|
| AAKRSYQMAF | 10    |
| ****DYV*** | 6     |
| ****PYV*** | 9     |
| ****YFT*** | 4     |
| ****TYR*** | 10    |
| ****LYF*** | 7     |
| ****AYT*** | 9     |
| ****FFV*** | 2     |
| ****LFL*** | 3     |
| ****LYH*** | 8     |
| ****SFQ*** | 10    |
| ****GFV*** | 8     |
| ****MYS*** | 8     |
| ****SYS*** | 9     |
| ****PFR*** | 9     |
| ****FFN*** | 2     |
| ****RYI*** | 9     |
| ****GFT*** | 8     |
| ****GYL*** | 8     |
| ****WYV*** | 3     |
| ****NYS*** | 9     |
| ****CFV*** | 7     |
| ****WYW*** | 4     |
| ****LYY*** | 7     |
| ****PYP*** | 8     |
| ****SYY*** | 10    |
| ****TFH*** | 10    |
| ****YXR*** | 5     |
| ****TFS*** | 10    |
| ****LFA*** | 6     |
| ****QYT*** | 9     |
| ****EYL*** | 6     |
| ****RYP*** | 7     |
| ****GYT*** | 9     |
| ****CYV*** | 9     |
| ****VFK*** | 6     |
| ****TYH*** | 10    |
| ****FFK*** | 2     |
| ****GFI*** | 8     |
| ****LYL*** | 4     |
| ****AYR*** | 8     |
| ****QFF*** | 7     |

**Class 4**

|            | Score |
|------------|-------|
| SRAAKRKCLT | 8     |
| *****FLK   | 2     |
| *****FFA   | 2     |
| *****WFK   | 2     |
| *****WCP   | 4     |
| *****CWP   | 7     |
| *****LFK   | 5     |
| *****WSE   | 7     |
| *****WST   | 5     |
| *****WCE   | 6     |
| *****CSE   | 7     |
| *****WWQ   | 6     |
| *****SCE   | 2     |
| *****LSA   | 4     |
| *****YCE   | 5     |
| *****FWQ   | 4     |
| *****YYE   | 4     |
| *****FLA   | 3     |
| *****SWP   | 1     |
| *****SFT   | 1     |
| *****YYQ   | 4     |
| *****SWA   | 1     |
| *****LSE   | 6     |
| *****YLE   | 4     |
| *****SFA   | 2     |
| *****FYE   | 5     |
| *****SFE   | 1     |
| *****SYA   | 2     |
| *****WYT   | 4     |
| *****WWP   | 2     |
| *****CWE   | 8     |
| *****WWE   | 7     |
| *****CYT   | 9     |
| *****SSE   | 3     |
| *****YCP   | 6     |
| *****WFQ   | 5     |
| *****LFQ   | 4     |
| *****WLT   | 3     |
| *****WCQ   | 6     |
| *****LWE   | 4     |

**Class 4**

|                    | Score |
|--------------------|-------|
| SRCSKRKDF          | 2     |
| **GR***V**         | 8     |
| **AL***A**         | 6     |
| **PS***W**         | 6     |
| **LT***M**         | 1     |
| **GA***H**         | 7     |
| **CP***P**         | 2     |
| **GD***P**         | 1     |
| **GG***G**         | 1     |
| **RP***P**         | 3     |
| **RS***G**         | 1     |
| **SP***M**         | 6     |
| **RE***A**         | 1     |
| **AR***G**         | 6     |
| **PG***P**         | 3     |
| **GF***F**         | 3     |
| **LP***S**         | 1     |
| **RA***L**         | 7     |
| **CE***A**         | 1     |
| **YC***G**         | 1     |
| **PE***T**         | 1     |
| **PA***P**         | 7     |
| **WM***R**         | 6     |
| **ST***G**         | 2     |
| **SW***T**         | 1     |
| **VR***Y**         | 8     |
| **QE***H**         | 2     |
| **IR***P**         | 3     |
| **LS***G**         | 2     |
| **SV***W**         | 5     |
| **SE***K**         | 2     |
| **PH***I**         | 7     |
| **GA***I**         | 3     |
| Q* <b>RKR</b> KLTT | 7     |
| Q* <b>RKR</b> R*** | 8     |
| R* <b>RKR</b> R*** | 10    |
| Q* <b>RKR</b> R*** | 3     |
| R* <b>RKR</b> R*** | 6     |
| Q* <b>RKR</b> R*** | 1     |
| R* <b>RKR</b> R*** | 1     |

Fig. S6. Class 3 and class 4 NLSs simultaneously mutated at multiple sites. The analysis was conducted as in Fig. S2. Asterisks represent unchanged residues.

**A**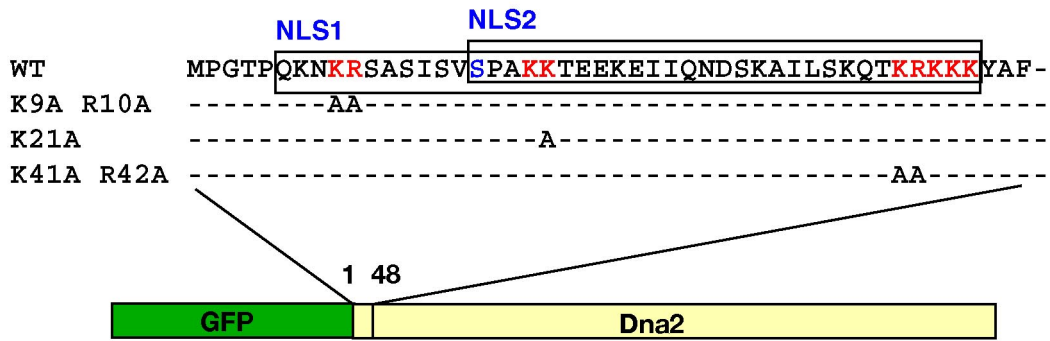**B**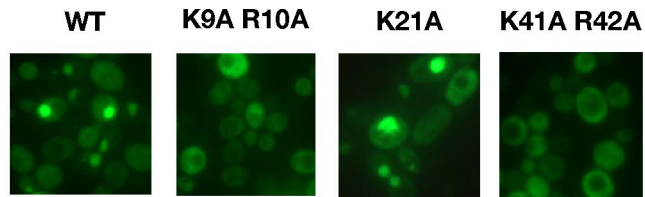

**Fig. 57.** A functional bipartite NLS of Dna2 contains a potential CDK site in its central linker region. (A) Schematic representation of the 2 predicted NLSs present in the N-terminal region of Dna2. Dna2 contains 2 putative bipartite NLSs at the N terminus (amino acids 1–48), where NLS1 and NLS2 contain a CDK1 consensus site in their linker and N-terminal flanking region, respectively. Although these NLSs have longer linker sequences than that of a standard linker with 10–12 aa, bipartite NLSs with long linkers have been found to be functional in structurally disordered regions, such as protein terminal regions. The putative core basic residues of NLS1 and NLS2 were separately replaced with alanine. The core basic stretches are highlighted in red, and a putative CDK1 phosphorylation site is marked in blue. (B) Subcellular localization of GFP-Dna2 fusion proteins mutated at NLS1 or NLS2. The subcellular localization of the alanine-replaced Dna2 mutants fused with GFP was observed in exponentially growing yeast cells.



| -3 -1 +1 +3 +5 +7 +9 +11 +13 +15 +17                  | Score |                                                        | Score |                                                | Score |
|-------------------------------------------------------|-------|--------------------------------------------------------|-------|------------------------------------------------|-------|
| <b>VC</b> L <b>KRS</b> AVVAVNAS <b>PAAKRR</b>         | 8     | <b>AAA</b> <b>KRS</b> AV <b>VEKQ</b> NAS <b>PAAKRR</b> | 6     | <b>AAA</b> <b>KRS</b> AVVAVNAS <b>WLPKRR</b>   | 3     |
| <b>MLR</b> *****                                      | 9     | ***** <b>LSR</b> ***** <b>T</b> ***                    | 7     | ***** <b>PSH</b> ***                           | 5     |
| <b>RCD</b> *****                                      | 5     | ***** <b>AAS</b> *****                                 | 7     | ***** <b>RPH</b> ***                           | 7     |
| <b>GLP</b> *****                                      | 4     | ***** <b>PFV</b> *****                                 | 6     | ***** <b>WER</b> ***                           | 5     |
| <b>TGP</b> *****                                      | 6     | ***** <b>FSL</b> *****                                 | 8     | ***** <b>LET</b> ***                           | 2     |
| <b>PRT</b> *****                                      | 8     | ***** <b>LCM</b> *****                                 | 6     | ***** <b>ALP</b> ***                           | 2     |
| <b>RKS</b> *****                                      | 8     | ***** <b>TGT</b> *****                                 | 6     | ***** <b>AWM</b> ***                           | 2     |
| <b>ARR</b> *****                                      | 9     | ***** <b>YVT</b> *****                                 | 7     | ***** <b>SML</b> ***                           | 4     |
| <b>KGG</b> *****                                      | 6     | ***** <b>TPP</b> *****                                 | 8     | ***** <b>FCA</b> ***                           | 5     |
| <b>KSV</b> *****                                      | 7     | ***** <b>GAG</b> *****                                 | 7     | ***** <b>RHT</b> ***                           | 5     |
| <b>SAG</b> *****                                      | 6     | ***** <b>LIL</b> *****                                 | 6     | ***** <b>RHS</b> ***                           | 4     |
| <b>FAP</b> *****                                      | 5     | ***** <b>RDA</b> *****                                 | 7     | ***** <b>DFT</b> ***                           | 3     |
| <b>RWE</b> *****                                      | 3     | ***** <b>FLQ</b> *****                                 | 7     | ***** <b>RLV</b> ***                           | 5     |
| <b>RST</b> *****                                      | 8     | ***** <b>FVQ</b> *****                                 | 7     | ***** <b>RLL</b> ***                           | 5     |
| <b>PKA</b> *****                                      | 6     | ***** <b>TFL</b> *****                                 | 7     | ***** <b>RRA</b> ***                           | 6     |
| <b>RSS</b> *****                                      | 8     | ***** <b>SLV</b> *****                                 | 7     | ***** <b>PGR</b> ***                           | 6     |
| <b>DGR</b> *****                                      | 8     | ***** <b>PHT</b> *****                                 | 7     | ***** <b>RRG</b> ***                           | 5     |
| <b>TDE</b> *****                                      | 2     | ***** <b>VGR</b> *****                                 | 7     |                                                |       |
| <b>RAT</b> *****                                      | 7     | ***** <b>GSI</b> *****                                 | 7     | <b>AAA</b> <b>KRS</b> AVVAVNAS <b>PPAKRVEP</b> | 5     |
| <b>GMV</b> *****                                      | 6     | ***** <b>FKP</b> *****                                 | 7     | ***** <b>AST</b>                               | 7     |
| <b>EEV</b> *****                                      | 2     | ***** <b>LVL</b> *****                                 | 5     | ***** <b>VTS</b>                               | 6     |
| <b>MGA</b> *****                                      | 6     | ***** <b>HYH</b> *****                                 | 7     | ***** <b>VAA</b>                               | 7     |
| <b>MLN</b> *****                                      | 5     | ***** <b>RLL</b> *****                                 | 6     | ***** <b>QVA</b>                               | 6     |
| <b>RII</b> *****                                      | 6     | ***** <b>HTP</b> *****                                 | 7     | ***** <b>STP</b>                               | 8     |
| <b>TGG</b> *****                                      | 7     | ***** <b>QDT</b> *****                                 | 7     | ***** <b>WGR</b>                               | 5     |
| <b>AVA</b> *****                                      | 5     |                                                        |       | ***** <b>TGP</b>                               | 4     |
| <b>GDL</b> *****                                      | 6     | <b>AAA</b> <b>KRS</b> AVVAV <b>RHLPAAKRR</b>           | 7     | ***** <b>AAV</b>                               | 9     |
| <b>RNY</b> *****                                      | 7     | ***** <b>NAT</b> *****                                 | 6     | ***** <b>SGP</b>                               | 4     |
| <b>THG</b> *****                                      | 7     | ***** <b>GCY</b> *****                                 | 7     | ***** <b>QNE</b>                               | 7     |
| <b>KQS</b> *****                                      | 6     | ***** <b>PYT</b> *****                                 | 7     | ***** <b>GGS</b>                               | 4     |
| <b>YRV</b> *****                                      | 8     | ***** <b>PHT</b> *****                                 | 7     | ***** <b>PPA</b>                               | 5     |
| <b>GRL</b> *****                                      | 8     | ***** <b>CDV</b> *****                                 | 9     | ***** <b>RHL</b>                               | 10    |
|                                                       |       | ***** <b>ARG</b> *****                                 | 6     | ***** <b>ASQ</b>                               | 7     |
| <b>AAA</b> <b>KRG</b> D <b>GV</b> AVNAS <b>PAAKRR</b> | 2     | ***** <b>TPT</b> *****                                 | 7     | ***** <b>FAS</b>                               | 9     |
| ***** <b>ANQ</b> *****                                | 5     | ***** <b>SFL</b> *****                                 | 8     | ***** <b>HLL</b>                               | 8     |
| ***** <b>RED</b> *****                                | 5     | ***** <b>ARK</b> *****                                 | 4     | ***** <b>QRS</b>                               | 10    |
| ***** <b>LLQ</b> *****                                | 7     | ***** <b>GRC</b> *****                                 | 7     | ***** <b>TSR</b>                               | 9     |
| ***** <b>YAT</b> *****                                | 5     | ***** <b>LQG</b> *****                                 | 9     | ***** <b>KVM</b>                               | 7     |
| ***** <b>KSR</b> *****                                | 7     | ***** <b>CPN</b> *****                                 | 6     | ***** <b>SPA</b>                               | 5     |
| ***** <b>PSP</b> *****                                | 8     | ***** <b>PLG</b> *****                                 | 7     | ***** <b>FAL</b>                               | 9     |
| ***** <b>RVG</b> *****                                | 6     | ***** <b>QVR</b> *****                                 | 4     | ***** <b>IRG</b>                               | 9     |
| ***** <b>SKE</b> *****                                | 4     | ***** <b>PGV</b> *****                                 | 8     | ***** <b>FPL</b>                               | 5     |
| ***** <b>WLV</b> *****                                | 4     | ***** <b>LRR</b> *****                                 | 5     | ***** <b>CRG</b>                               | 9     |
| ***** <b>DTS</b> *****                                | 2     | ***** <b>PTP</b> *****                                 | 6     | ***** <b>GGM</b>                               | 4     |
| ***** <b>RGT</b> *****                                | 7     | ***** <b>GLY</b> *****                                 | 8     | ***** <b>PVD</b>                               | 3     |
| ***** <b>VTT</b> *****                                | 3     | ***** <b>TPR</b> *****                                 | 7     | ***** <b>DGR</b>                               | 2     |
| ***** <b>RRL</b> *****                                | 9     | ***** <b>GRW</b> *****                                 | 7     | ***** <b>LAP</b>                               | 8     |
| ***** <b>IVL</b> ***** <b>T</b> ***                   | 2     | ***** <b>GGE</b> *****                                 | 9     | ***** <b>SRK</b>                               | 9     |
| ***** <b>DRA</b> *****                                | 3     | ***** <b>VRA</b> *****                                 | 5     | ***** <b>SLP</b>                               | 5     |
| ***** <b>STL</b> *****                                | 3     | ***** <b>SAI</b> *****                                 | 6     | ***** <b>VCS</b>                               | 9     |
| ***** <b>TNF</b> *****                                | 3     |                                                        |       | ***** <b>TPA</b>                               | 6     |
| ***** <b>QPM</b> *****                                | 2     |                                                        |       | ***** <b>QIP</b>                               | 6     |
| ***** <b>YRR</b> *****                                | 6     |                                                        |       | ***** <b>DAR</b>                               | 4     |
| ***** <b>AQP</b> *****                                | 5     |                                                        |       | ***** <b>SEP</b>                               | 7     |
| ***** <b>KDE</b> *****                                | 5     |                                                        |       | ***** <b>LSS</b>                               | 7     |
| ***** <b>APT</b> *****                                | 3     |                                                        |       | ***** <b>EIT</b>                               | 1     |
| ***** <b>DVK</b> *****                                | 1     |                                                        |       | ***** <b>EWV</b>                               | 1     |
| ***** <b>IER</b> *****                                | 2     |                                                        |       | ***** <b>RAS</b>                               | 9     |
| ***** <b>GER</b> *****                                | 1     |                                                        |       |                                                |       |

Fig. 58. Bipartite NLSs simultaneously mutated at multiple sites. Three consecutive residues within the indicated bipartite NLS templates were simultaneously replaced with other residues at the indicated flanking or linker positions. The activity scores of the NLS mutants were measured in yeast. Asterisks represent unchanged residues.

**Table S1. Nuclear import activities of NLSs predicted in yeast nonnuclear proteins**

| Name    | Annotation                                      | Loc.     | Predicted NLS      | Calc. | Meas. |
|---------|-------------------------------------------------|----------|--------------------|-------|-------|
| Fus1    | Membrane protein localized to the shmoo tip     | Vac      | 396 PLKKRKRKRQ     | 9     | 10    |
| Fbp26   | Fructose-2,6-bisphosphatase                     | Cyt      | 108 STRKRRKWLKDIC  | 10.5  | 10    |
| Phm7    | Protein of unknown function                     | Vac, CP  | 274 YVPHKKRPKHR    | 9     | 8     |
| Tom71   | Mitochondrial outer membrane protein            | Mt       | 83 KKKNKRRNNK      | 9     | 7     |
| Gcn1    | Positive regulator of the Gcn2p kinase          | Cyt      | 166 QHRKRIRYCIF    | 10.5  | 7     |
| Qri5    | Mitochondrial protein of unknown function       | Mt       | 90 KHKLRKRKRREK    | 12    | 9     |
| Pho8    | Repressible alkaline phosphatase                | Vac      | 22 RPKKRIRSKRSKI   | 11    | 9     |
| Btn2    | Protein that modulates arginine uptake          | Cyt      | 34 YYPECKRRKAIK    | 8     | 9     |
| Pex28   | Peroxisomal integral membrane protein           | –        | 560 PMFKRRRLI      | 12    | 10    |
| Cct6    | Subunit of the chaperonin Cct ring complex      | Cyt      | 318 RRAKRRNMER     | 8     | 9     |
| Gup2    | Probable membrane protein                       | –        | 194 HSLKRRLIAAF    | 8.5   | 6     |
| Och1    | Mannosyltransferase of cis-Golgi                | Glg      | 313 YRHKRRHDET     | 10    | 10    |
| Bni1    | Formin, nucleates actin filaments formation     | Cyt, Bud | 1351 YPRPHKKLKQLHW | 9.5   | 7     |
| Pex31   | Peroxisomal integral membrane protein           | –        | 425 RVRKRKVSFS     | 9     | 7     |
| End3    | EH domain protein involved in endocytosis       | PC       | 99 LIKERKRRKQI     | 9.5   | 9     |
| Met7    | Folylpolyglutamate synthetase                   | Cyt      | 416 RLSKRKILLF     | 9.5   | 6     |
| Ybt1    | Member of the ABC transporter family            | VM       | 334 HKVKRKRIFSLNF  | 9     | 9     |
| Pkc1    | Serine/threonine kinase                         | Cyt, Bud | 812 RAAKRRKVSLDNF  | 9.5   | 10    |
| Gpb2    | $\beta$ subunit of the heterotrimeric G protein | Cyt, Mt  | 777 PPRKRKVDTL     | 13    | 8     |
| Adp1    | Permease of the ABC transporter family          | ER       | 648 PQGKRRRIR      | 9     | 9     |
| Gem1    | Outer mitochondrial membrane GTPase             | –        | 427 KPRKMRRRSGLY   | 8     | 8     |
| Jem1    | DnaJ-like chaperone                             | ER       | 387 PDVKRAKLAAPFC  | 8.5   | 9     |
| Ipa1    | Mitochondrial matrix protein                    | Mt       | 132 PPKRKRKLR      | 13    | 9     |
| Ena1    | P-type ATPase sodium pump                       | CP       | 746 HRRKKFCTM      | 8.5   | 10    |
| Mnn5    | $\alpha$ -1,2-mannosyltransferase               | PC       | 4 RLKRRKIL         | 9.5   | 10    |
| Sln1    | Histidine kinase osmosensor                     | CP       | 1193 LSKPIKRPKLK   | 8     | 7     |
| YLR345W | Similar to 6-phosphofructo-2-kinase             | Cyt      | 366 GPRKRTHDTAL    | 11    | 9     |
| Sla1    | Protein that binds to cytoskeletal proteins     | Cyt, PC  | 263 GRKRRKAKLS     | 11.5  | 10    |
| Rds1    | Zinc cluster protein                            | –        | 19 KIKRKRCDKLR     | 9     | 8     |
| Mnn10   | Subunit of a mannosyltransferase complex        | Glg, PC  | 104 VPPYSKRSRWSFW  | 9     | 3     |
|         |                                                 |          | 104 VPPYAKRSRWSFW  | 9     | 6     |
|         |                                                 |          | 104 VPPYSKRARWSFW  | 11    | 7     |

The translated database of *S. cerevisiae* ORFs was searched for monopartite NLSs by using cNLS Mapper. The 30 NLSs presented were randomly selected from 80 predicted NLSs with calculated scores of  $\leq 8$  in apparently nonnuclear proteins, and they were assayed for NLS activity with the pTUE-GFP3 vector in yeast. The calculated (Calc.) and measured (Meas.) scores for the predicted NLSs are indicated in the last columns. In the Mnn10 NLS, the putative phosphorylation sites and their alanine-substituted sites are italicized. The subcellular localizations of the indicated proteins (Loc.), from the yeast localization database, are abbreviated as follows: cytoplasm (Cyt), cell periphery (CP), Golgi (Glg), mitochondria (Mt), punctate composite (PC), vacuole (Vac), vacuolar membrane (VM), and invisible or ambiguous localization (–).

**Table S2. Nuclear import activities of bipartite NLSs in yeast nuclear proteins that contain a traditional consensus pattern but show a low score of calculation with cNLS Mapper**

| Name   | Annotation                             | Putative NLS              | Calc. | Meas |
|--------|----------------------------------------|---------------------------|-------|------|
| Smc3   | Subunit of cohesin complex             | 993 NVNKRAFENFKKFNERRKD   | < 1   | 2    |
| Snt309 | Protein involved in mRNA splicing      | 29 ANIKREPVHPEIRGILAKRKG  | < 1   | 1    |
| Tfa2   | TFIID subunit                          | 30 VGQKKTNDTVITIDGNTRKRT  | 1     | 1    |
| Hda1   | Subunit of histone deacetylase complex | 4 VMVKKEVLENDHDLKRKL      | < 1   | 2    |
| Mot1   | Regulator interacting with TBP         | 192 NANKKSARMLAMARRKKKMS  | 1     | 2    |
| Abf1   | DNA binding transcription factor       | 417 QIARRITTYKARFVLKCKK   | < 1   | 3    |
| Prp43  | RNA helicase involved in mRNA splicing | 646 DNIRKALASGFFMQVAKKRS  | 2.5   | 1    |
| Rap1   | DNA binding transcription factor       | 801 EQIRKLVKKHGTGRMEMRKRF | < 1   | 1    |
| Orc5   | Subunit of origin recognition complex  | 349 IFSRKTRIIQGAAAYGRRKKK | 2.5   | 2    |
| Rox1   | DNA binding transcription factor       | 74 EHERKYPEYKYKPVRSKCKKQ  | < 1   | 1    |

The calculated (Calc.) and measured (Meas.) scores of the indicated bipartite NLSs are indicated in the last columns.

**Table S3. List of predicted CDK1-regulated nucleocytoplasmic shuttling proteins**

| Name                                             | Annotation                                                            | Localization | CDK1 target | Predicted NLS                                  | Score |
|--------------------------------------------------|-----------------------------------------------------------------------|--------------|-------------|------------------------------------------------|-------|
| Search for CDK1 site-containing monopartite NLSs |                                                                       |              |             |                                                |       |
| Swi5*                                            | Transcription factor that activates M/G1 transcription                | N, NC, C     | Yes         | 645 RSPRKRGRPR                                 | 6     |
| Swi6*                                            | Component of G1-specific transcription factors, MBF and SBF           | N, NC, C     | Yes         | 158 LGSPLKCLKID                                | 9     |
| Mcm3*                                            | Subunit of MCM2-7 prereplicative complex                              | Not tested   | Yes         | 765 SPKKRQRVR                                  | 6     |
| Whi5*                                            | Inhibitor of G1-specific transcription factor SBF                     | N, NC, C     | Yes         | 4 RTPKRSRTSDE<br>47 SPVRLKNG<br>88 SPVNKRRVGIT | 6.5 6 |
| Acm1*                                            | Inhibitor of anaphase promoting complex                               | N, NC, C     | Yes         | 30 RSPSKRRSQID                                 | 4     |
| Yen1†                                            | Unknown function                                                      | N, NC, C     | Yes         | 679 SPIKKSRTT                                  | 4.5   |
| Psy4†                                            | Protein phosphatase involved in the repair of cross-linked DNA        | N, NC, C     | No          | 320 TPRKRPPTDL<br>345 LTTPKKYKHT               | 8     |
| Msa1†                                            | Activator of G1-specific transcription factors, MBF and SBF           | N, SP, C     | Yes         | 53 PSPNKRRLSID<br>84 TPTKKSSTN                 | 8     |
| Pds1†                                            | Securin, anaphase inhibitor                                           | N, NC, C     | Yes         | 71 SPTKRLHHTH                                  | 6     |
| Rif1                                             | Protein that controls telomere length                                 | N            | No          | 55 SPTPKRRKLA                                  | 13    |
| Sfg1                                             | Transcription factor that represses early G1                          | Ambiguous    | Yes         | 28 TPSKCKKYSSGF<br>45 TPSKRFRLYQAK             | 6 6.5 |
| Ela1                                             | Elongin A, F-box protein                                              | N, NP        | No          | 269 TPVKKRRSESP                                | 8     |
| Nbp1                                             | Spindle pole body component                                           | SP           | Yes         | 71 RKTPKRRLLTKI                                | 8.5   |
| Eaf7                                             | Subunit of the NuA4 histone acetyltransferase complex                 | N            | No          | 397 SPKRRKRRKAG                                | 15    |
| Sfi1                                             | Protein required for spindle pole body duplication                    | NC, SP       | Yes         | 799 DSSPKRRKDF                                 | 4     |
| Vnx1                                             | Monovalent cation/H + antiporter                                      | VM           | Yes         | 119 PSSPKRMHSS                                 | 4.5   |
| Nur1                                             | Unknown function                                                      | PC           | Yes         | 473 RSPKKKKNYH                                 | 5     |
| Orc1                                             | Subunit of the origin recognition complex                             | N            | Yes         | 304 SPRKRGRKI                                  | 5     |
| Sum1                                             | Transcriptional repressor for middle sporulation-specific gene        | N            | -           | 737 ISPKRRRTED                                 | 6     |
| Bye1                                             | Negative regulator of transcription elongation                        | N            | -           | 176 ESPRKRKRSPD                                | 9     |
| Mcm21                                            | Protein involved in minichromosome maintenance                        | NC           | -           | 139 SPSKRRKRLK                                 | 8     |
| Ies2                                             | Subunit of the INO80 chromatin remodeling complex                     | N, NC        | -           | 82 SPSKRRHLHTR                                 | 10    |
| Heh2                                             | Inner nuclear membrane protein                                        | NP           | -           | 123 SPKRRKRKRSS                                | 9     |
| Pct1                                             | Phosphocholine cytidylyltransferase                                   | N, No        | -           | 59 TPRKRRRLTKE                                 | 15    |
| Search for CDK1 site-containing bipartite NLSs   |                                                                       |              |             |                                                |       |
| Cdh1*                                            | Activator of anaphase promoting complex                               | N, NC, C     | Yes         | 24 KRVSKRPISSSSASLLSSPSRRSR                    | 5.5   |
| Dna2†                                            | Nuclease/helicase, processing Okazaki fragment and DSBs               | N, NC, C     | Yes         | 9 KRSASISVSPAkkTEEKIIQNDSK<br>AIIKSKQTKRKKK    | 4.5   |
| Srs2                                             | DNA helicase involved in DNA double strand break repair               | N, SP        | Yes         | 879 SPEKRYAPETTSFHSPTKKKVY                     | 6.5   |
| Msh6                                             | Protein required for mismatch repair                                  | N            | Yes         | 26 KKMKQSSLLSFFSKQVPSGT<br>PSKKVQ              | 8     |
| Kar3                                             | Nuclear kinesin, microtubule motor protein                            | N, SP        | Yes         | 6 TPTKGRSTQHLSTPSKNDILAMN<br>GHKRRNT           | 4.5   |
| Far1                                             | CDK inhibitor                                                         | N, NC        | Yes         | 11 KKIHTPPSGDRDAERSPPKFLR                      | 5     |
| Yox1                                             | Homeodomain-containing transcriptional repressor                      | Ambiguous    | Yes         | 349 KRPVSNPSGSPKRKRKFG                         | 8.5   |
| Kar4                                             | Transcription factor that regulates the pheromone response pathway    | NC           | Yes         | 301 SPKRYKEEIANLGSNIPLKNEIELL<br>RPRSP         | 5     |
| Sir4                                             | Protein involved in assembly of silent chromatin domains at telomeres | N            | Yes         | 514 TPSKRRQLGEIPNPMKHKHPN                      | 9.5   |
| Spc110                                           | Spindle pole body component                                           | SP           | Yes         | 36 SPTKVPANNGDENEGPVKK<br>RQRRS                | 8     |

The first 24 and the subsequent 10 proteins were predicted by the searches for CDK1 site-containing monopartite NLSs and CDK1 site-containing bipartite NLSs, respectively. To reduce the toxicity of some overexpressed proteins in yeast, the low-copy plasmid pAUA-GFP was used to express Whi5, Cdh1, Rif1, Sfg1, Sum1, Mcm21, Ies2, and Heh2, whereas the galactose-inducible plasmid pYES-GFP was used to express Pds1, Sfi1, and Srs2. The subcellular localizations of the indicated proteins (Localization) are abbreviated as follows: nucleus (N), cytoplasm (C), both nucleus and cytoplasm (NC), spindle pole (SP), punctate composite (PC), vacuolar membrane (VM), and nucleolus (No). Proteins included in the 235 reported CDK1 substrates (5, 6) are indicated as potential CDK1 targets, whereas proteins included in reported non-CDK1 substrates (496 proteins other than the top 200 substrates, from ref. 5) and proteins included in neither set are indicated as "no" and "-", respectively. In the next columns, potential CDK1 phosphorylation sites within and around the predicted NLSs are indicated by bold type, and the core basic residues of the predicted NLSs are indicated by italic type. The calculated scores (Score) of the predicted NLSs are indicated in the last columns.

\*Previously reported proteins that exhibit nucleocytoplasmic shuttling in a cell cycle- and CDK1-dependent manner..

†Previously unidentified proteins that exhibit nucleocytoplasmic shuttling in a cell cycle- and CDK1-dependent manner.
